# Supplementary material for: Polyphasic Approach Utilized for the Identification of Two New Toxigenic Members of Penicillium Section Exilicaulis, P. krskae and P. silybi spp. nov.
Source: MDPI journal article supplement (doi:10.3390/jof7070557), 2021-07-13
Supplement: s1 [file s1]

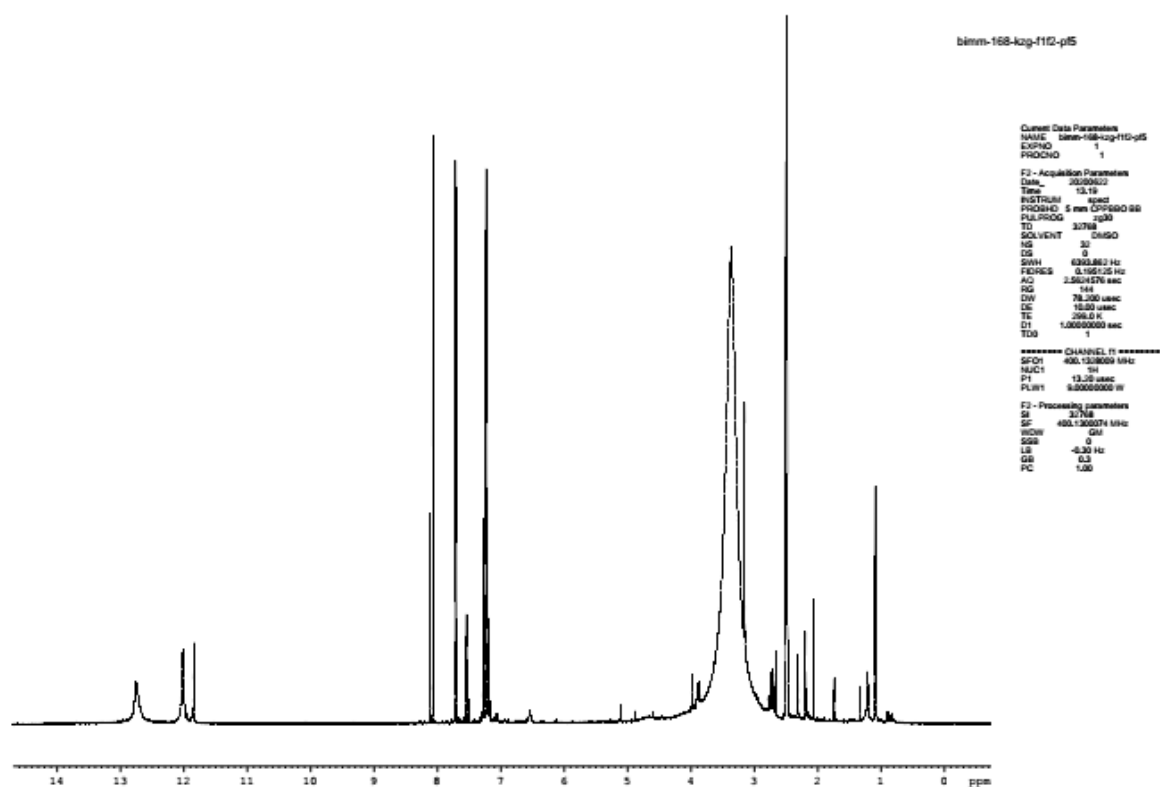

Figure S1.  $^1\text{H}$  NMR spectrum of the mixture of 1, 2, and 3.

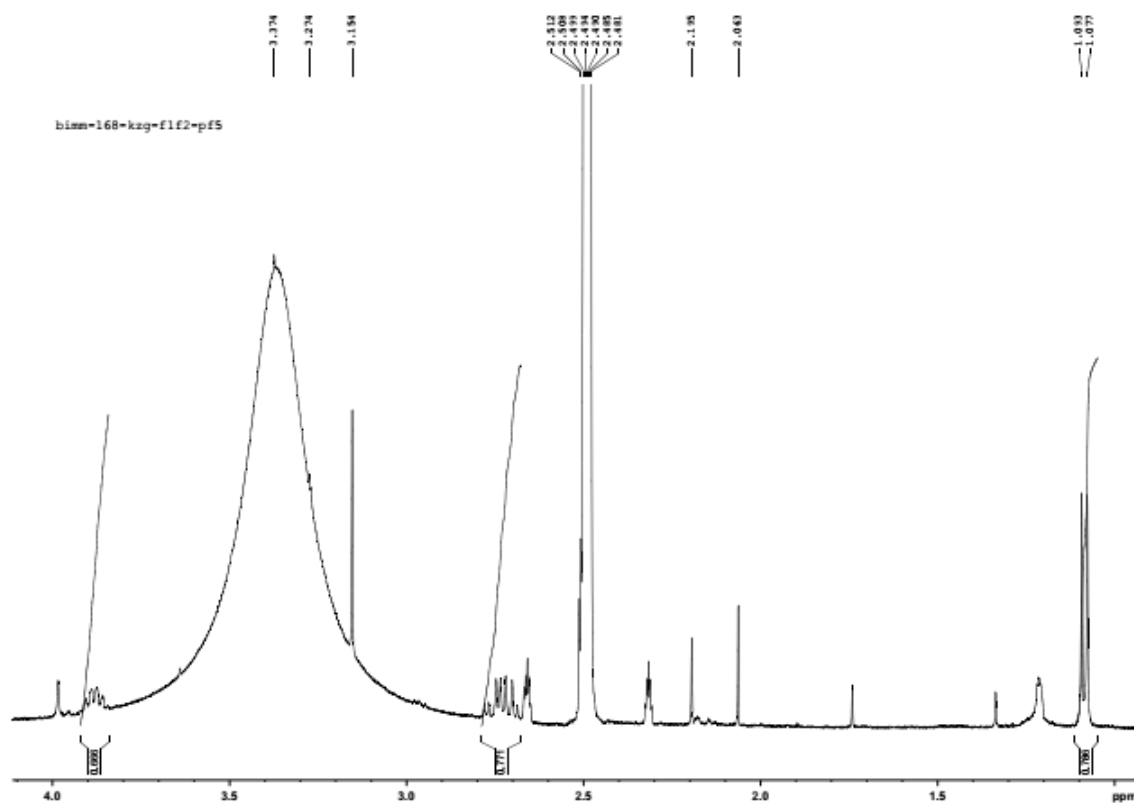

Figure S2.  $^1\text{H}$  NMR spectrum of the mixture of 1, 2, and 3, expansion.

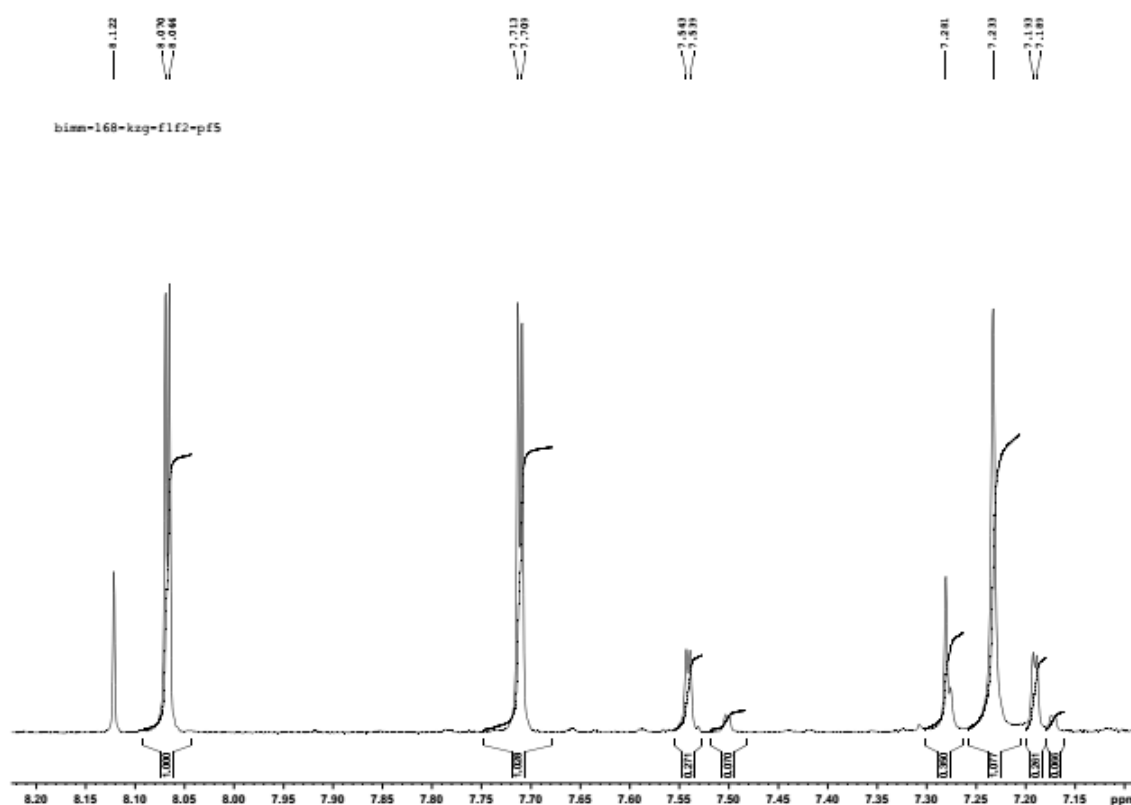Figure S3.  $^1\text{H}$  NMR spectrum of the mixture of 1, 2, and 3, expansion.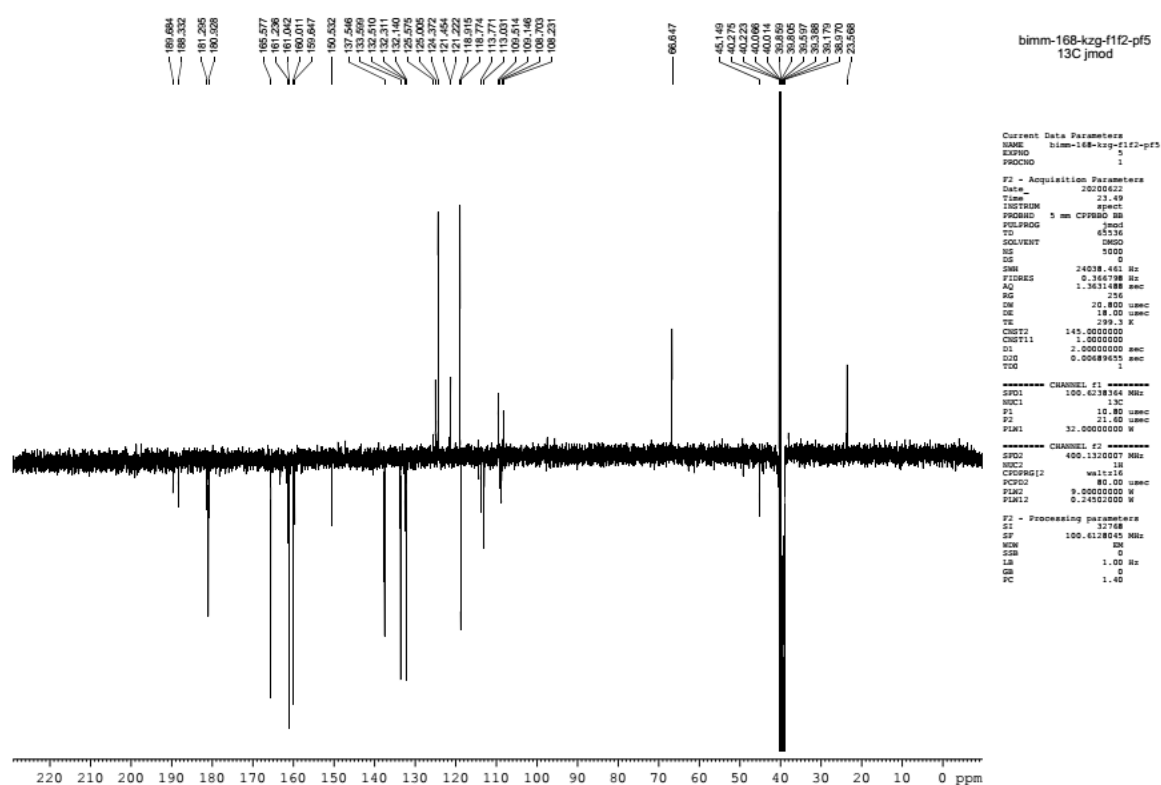Figure S4.  $^{13}\text{C}$  NMR spectrum of the mixture of 1, 2, and 3.

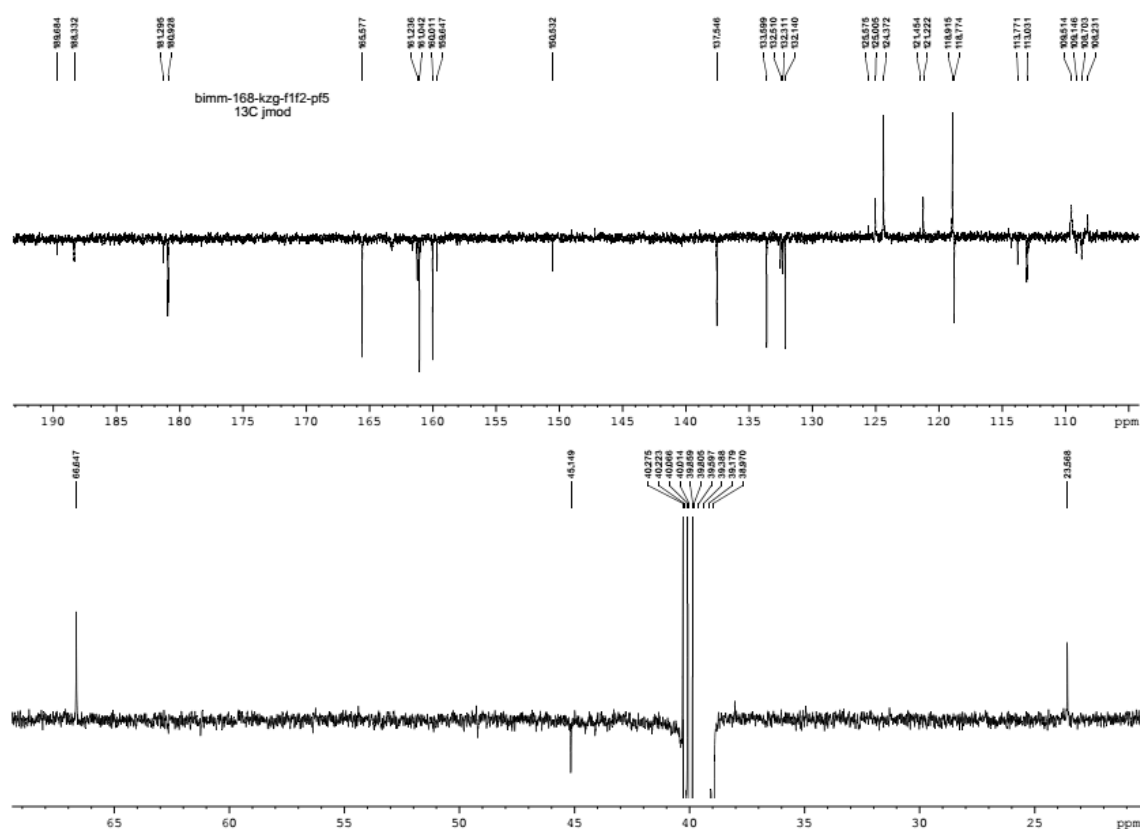

Figure S5.  $^{13}\text{C}$  NMR spectrum of the mixture of 1, 2, and 3, expansion.

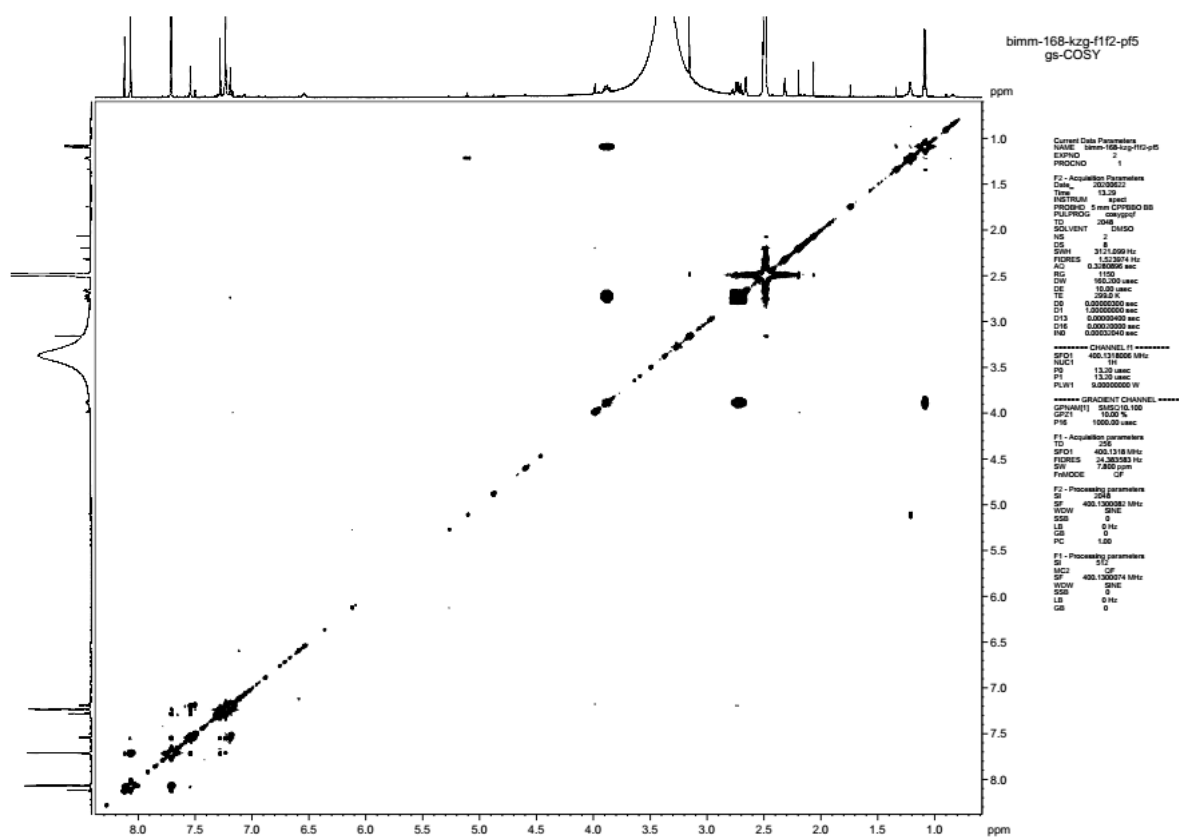

Figure S6. COSY NMR spectrum of the mixture of 1, 2, and 3.

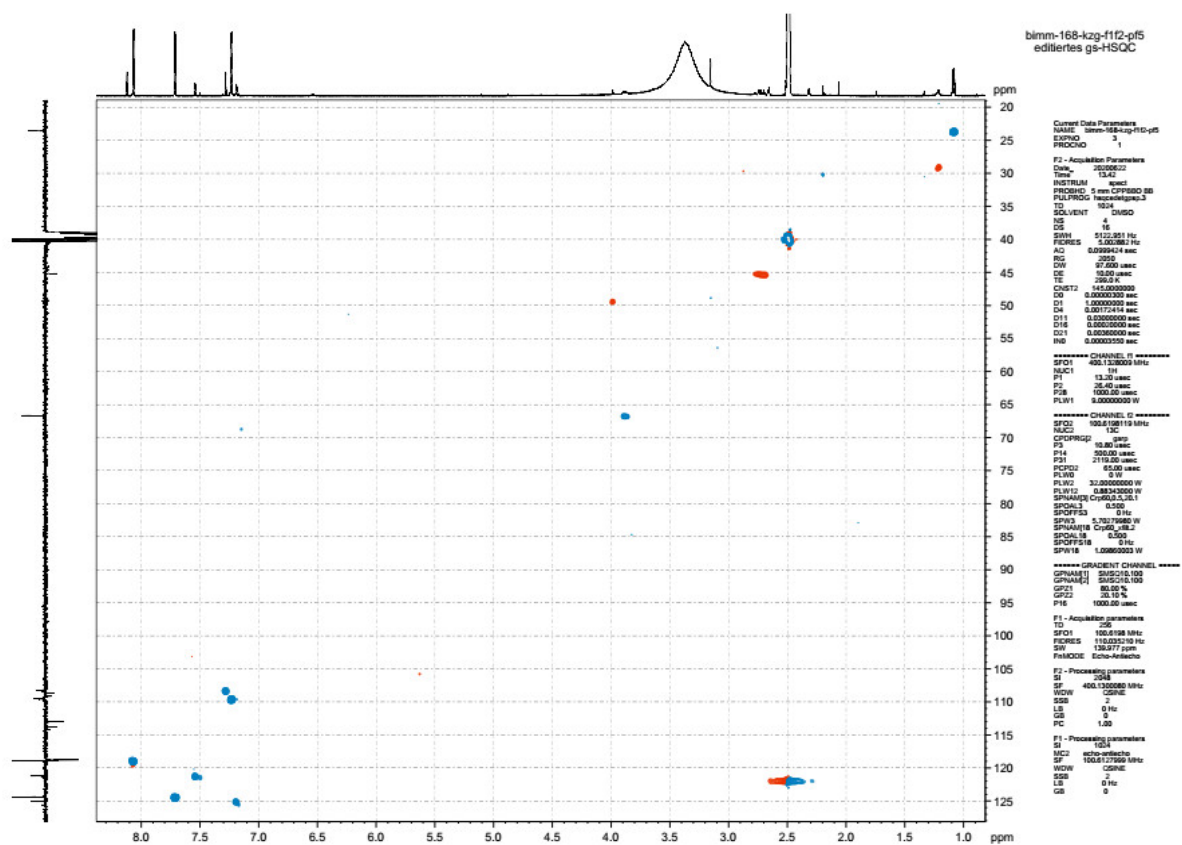

Figure S7. Edited HSQC NMR spectrum of the mixture of 1, 2, and 3.

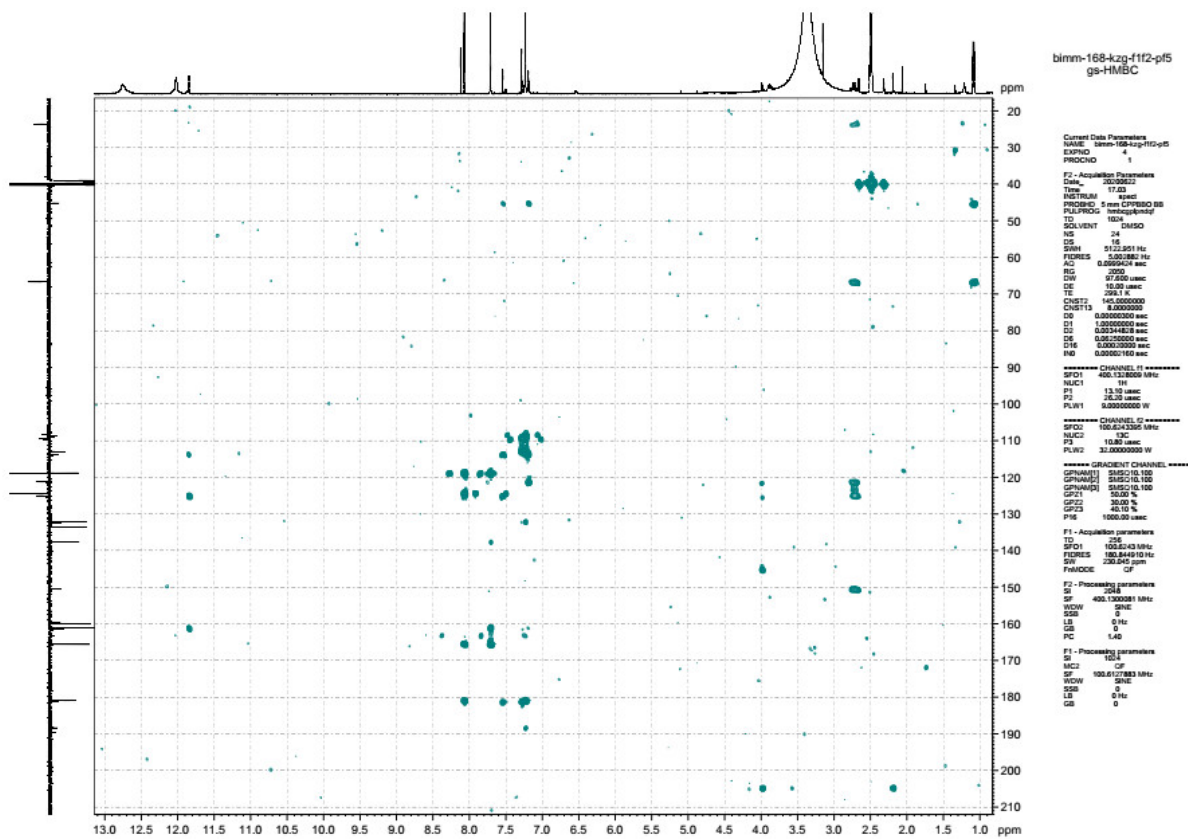

Figure S8. HMBC NMR spectrum of the mixture of 1, 2, and 3.

742\_BiMM\_M49\_Pizza\_KZG\_Batch208\_F1F2\_pF5 #10454 RT: 26.20 AV: 1 NL: 1.43E8  
T: FTMS - p ESI Full ms [100.0000-1000.0000]

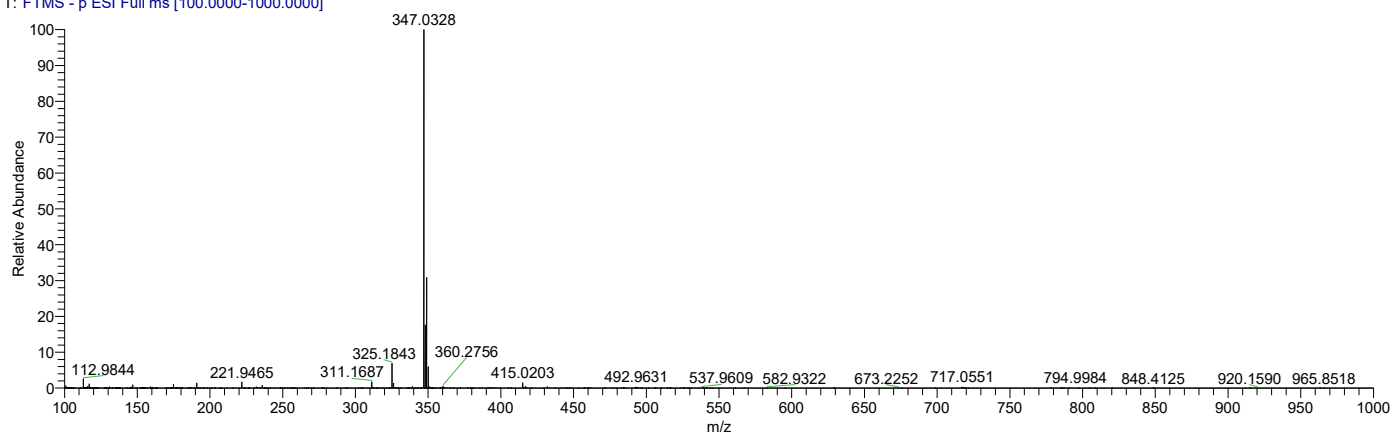

Figure S9. LC-ESI-MS spectrum negative mode (26.2 min) of compound 1.

742\_BiMM\_M49\_Pizza\_KZG\_Batch208\_F1F2\_pF5 #10010 RT: 25.08 AV: 1 NL: 3.13E7  
T: FTMS - p ESI Full ms [100.0000-1000.0000]

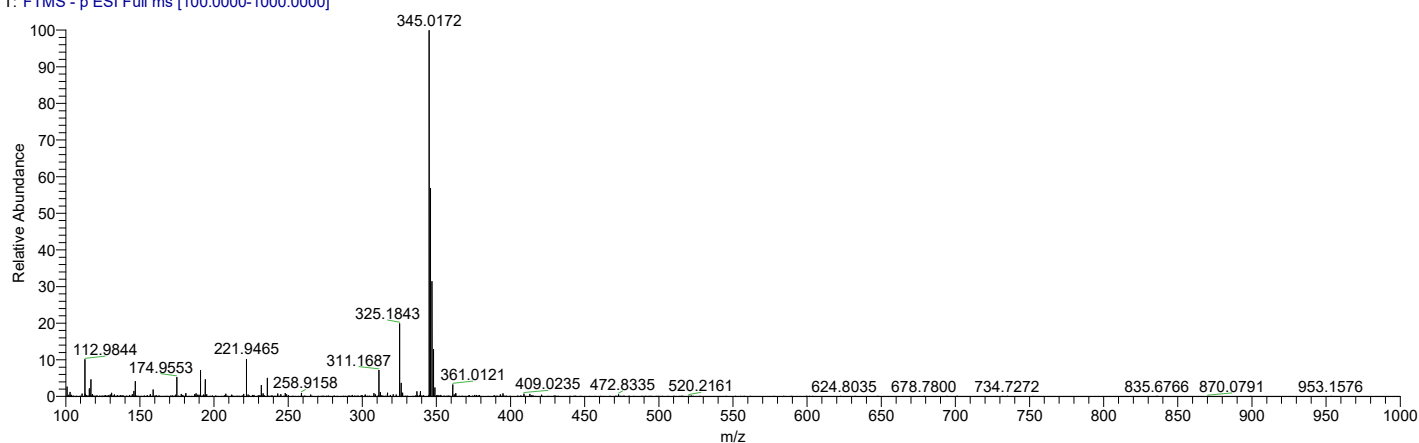

Figure S10. LC-ESI-MS spectrum negative mode (25.1 min) of compound 2.

742\_BiMM\_M49\_Pizza\_KZG\_Batch208\_F1F2\_pF5 #10778 RT: 27.00 AV: 1 NL: 2.57E8  
T: FTMS - p ESI Full ms [100.0000-1000.0000]

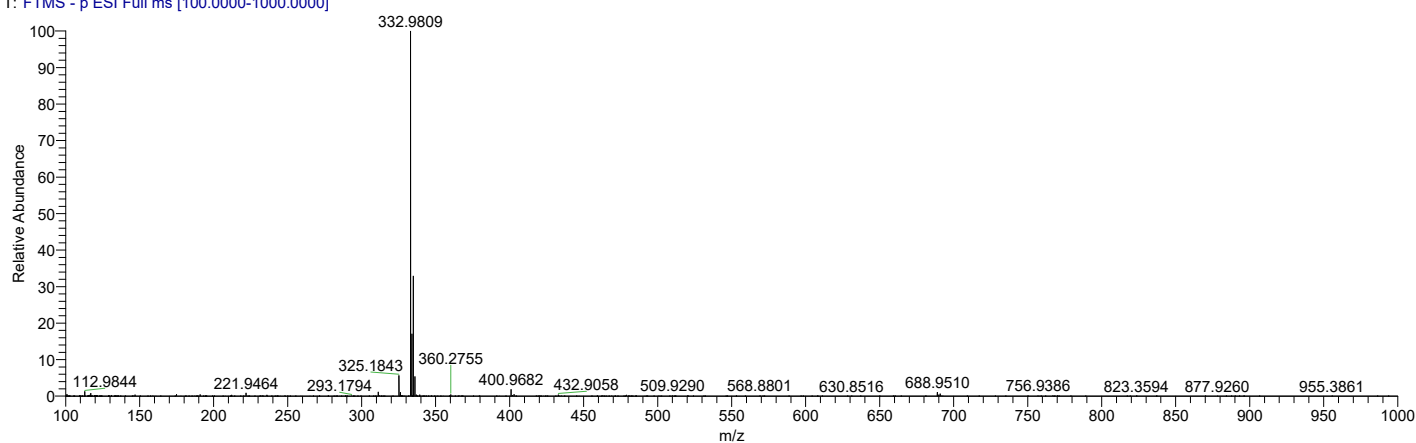

Figure S11. LC-ESI-MS spectrum negative mode (27.0 min) of compound 3.

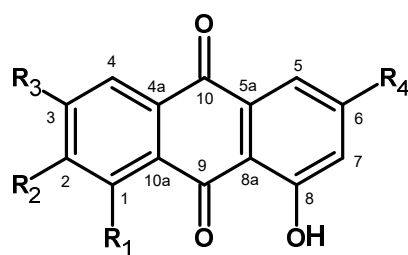

|                                        | R <sub>1</sub>   | R <sub>2</sub> | R <sub>3</sub>   | R <sub>4</sub>     |
|----------------------------------------|------------------|----------------|------------------|--------------------|
| 2-chloro-isorhodoptilometrin (1)       | OH               | Cl             | OH               |                    |
| 2-chloro-desmethyl dermoquinone (2)    | OH               | Cl             | OH               |                    |
| 2-chloroemodic acid (3)                | OH               | Cl             | OH               | COOH               |
| 7-chlorocitrorosein                    | OCH <sub>3</sub> | Cl             | OH               |                    |
| emodin                                 | OH               | H              | OH               | CH <sub>3</sub>    |
| citreorosein<br>(ω-hydroxyemodin)      | OH               | H              | OH               | CH <sub>2</sub> OH |
| emodic acid                            | OH               | H              | OH               | COOH               |
| (+)-2'-S-isorhodoptilometrin           | OH               | H              | OH               |                    |
| 1'-hydroxyisorhodoptilometrin          | OH               | H              | OH               |                    |
| 1'-hydroxy-2'-keto-isorhodoptilometrin | OH               | H              | OH               |                    |
| desmethyl dermoquinone                 | OH               | H              | OH               |                    |
| dermoquinone                           | OH               | H              | OCH <sub>3</sub> |                    |
| 2-hydroxyemodic acid                   | OH               | OH             | OH               | COOH               |

Figure S12. Structures of detected anthraquinone derivatives.

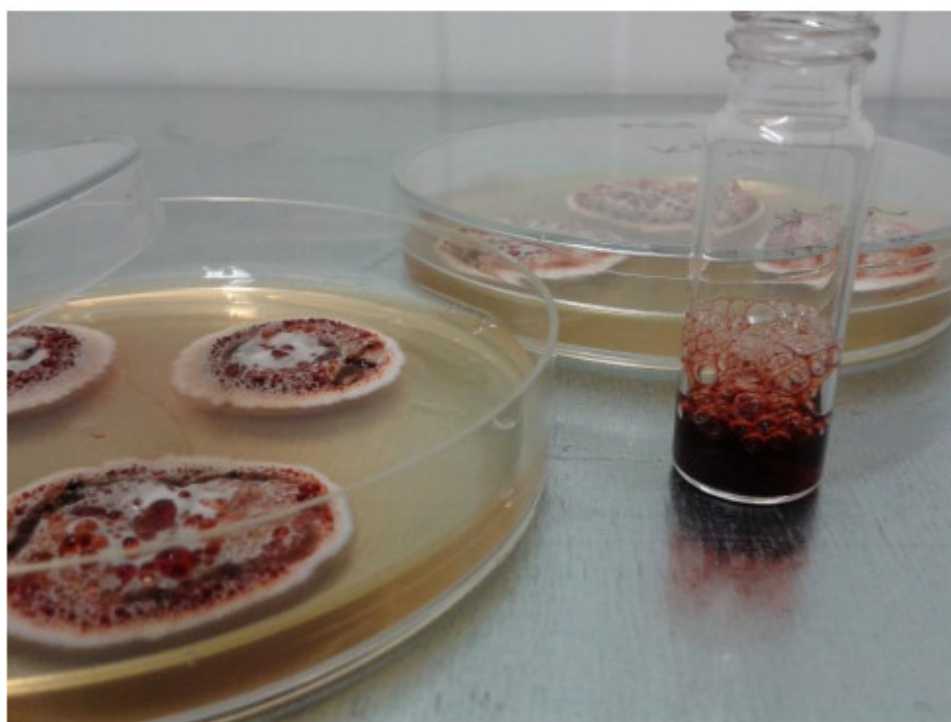

**Figure S13.** Colonies of *P. krskae* BiMM-F280 growing on MEA (7days, 25°C, dark) and red exudate collected for LC-MS/MS analysis.
